# Supplementary material for: Hierarchical hexagonal boron nitride nanowall–diamond nanorod heterostructures with enhanced optoelectronic performance
Source: Royal Society of Chemistry journal article supplement (doi:10.1039/c6ra19596b), 2016-01-01
Supplement: c6ra19596b1.pdf [file c6ra19596b1.pdf]

**Supporting Information**

**Hierarchical hexagonal boron nitride nanowall–diamond nanorod heterostructures with enhanced optoelectronic performance**

Kamatchi Jothiramalingam Sankaran,<sup>\*ab</sup> Duc Quang Hoang,<sup>ab</sup> Svetlana Korneychuk,<sup>c</sup> Srinivasu Kunuku,<sup>d</sup> Joseph Palathinkal Thomas,<sup>e</sup> Paulius Pobedinskas,<sup>ab</sup> Sien Drijkoningen,<sup>ab</sup> Marlies K. Van Bael,<sup>ab</sup> Jan D'Haen,<sup>ab</sup> Johan Verbeeck,<sup>c</sup> Keh-Chyang Leou,<sup>d</sup> Kam Tong Leung,<sup>e</sup> I-Nan Lin,<sup>f</sup> and Ken Haenen<sup>\*ab</sup>

\*E-mail: [sankaran.kamatchi@uhasselt.be](mailto:sankaran.kamatchi@uhasselt.be), [ken.haenen@uhasselt.be](mailto:ken.haenen@uhasselt.be)

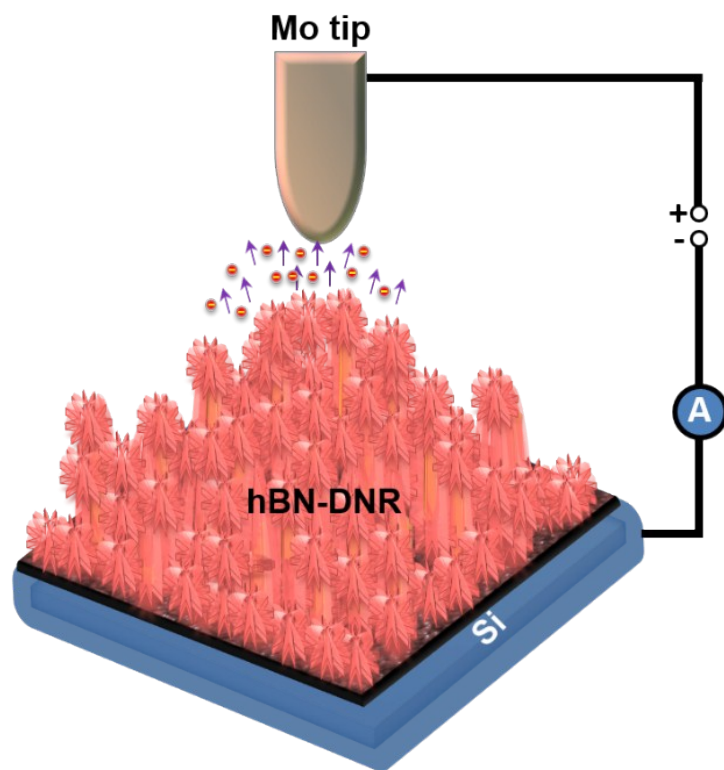

**Fig. S1.** The schematic of FEE measurement.

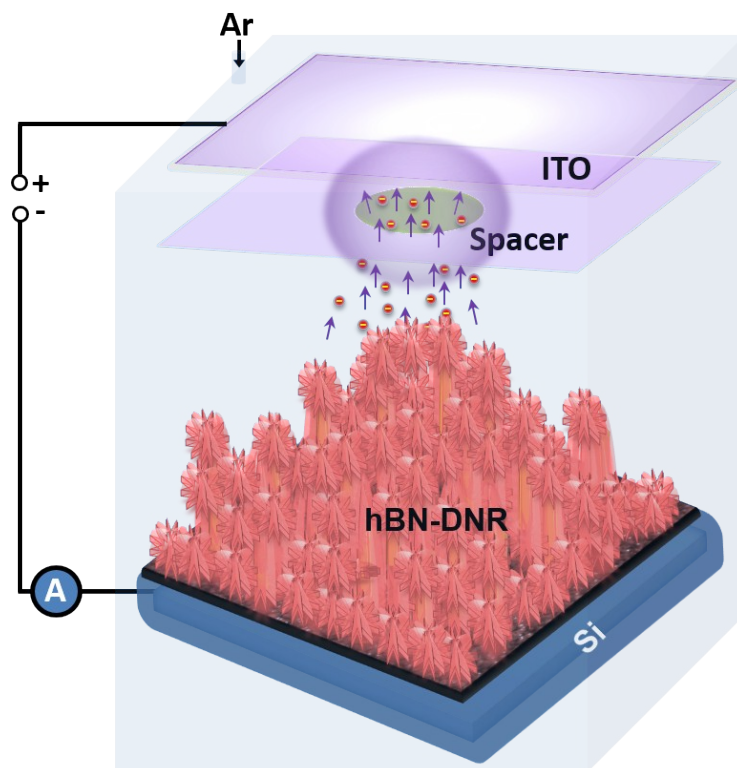

**Fig. S2.** The schematic of microplasma device measurement.
